# Supplementary material for: Human RAP2A homolog of the Drosophila asymmetric cell division regulator Rap2l targets the stemness of glioblastoma stem cells
Source: eLife. 2025 Nov 28;14:RP105690. doi: 10.7554/eLife.105690 (PMC12662630; doi:10.7554/eLife.105690)
Supplement: Figure 2—figure supplement 1—source data 1. [file elife-105690-fig2-figsupp1-data1.xlsx]

## Sheet: Sheet1
		CONTROL							RNAiKK								RNAi GD								RNAi BDSC
		Total Brains	18		Average	1.14359			Total Brains	15		Average	1.23377				Total Brains	17		Average	1.33129				Total Brains	15		Average	1.27407
		Impaired Brains	11		Median	1			Impaired Brains	14		Median					Impaired Brains	15		Median	1				Impaired Brains	13		Median	1
		Sample size (Clones)	195		SD	0.351576			Sample size (Clones)	154		SD	0.43973				Sample size (Clones)	163		SD	0.509844				Sample size (Clones)	135		SD	0.447708
		Brain	Clon	NBs counting					Brain	Clon	NBs Analysis						Brain	Clon	NBs						Brain	Clon	NBs
		B1LH 0.9	1	1		1			B1LH 0.9	1	2		2												B1LH 0.9	1	1		1
			2	1		1				2	1		1				B1LH 1	1	1		1					2	1		1
			3	1		1				3	1		1					2	1		1					3	1		1
			4	1		1			B2LH 0.8	1	1		1					3	1		1					4	2		2
			5	1		1				2	2		2					4	1		1					5	1		1
			6	1		1				3	2		2					5	1		1				B1RH 0.8	1	2?		2
		B1RH 0.8	1	1		1				4	1		1					6	1		1					2	1		1
			2	1		1				5	1		1				B1RH 1	1	1		1					3	1		1
			3	1		1				6	1		1					2	2?		2					4	2		2
			4	1		1			B3LH 0.8	1	1		1					3	1		1					5	1		1
			5	1		1				2	1		1					4	1		1				B2LH 0.8	1	2		2
			6	1		1				3	1		1				B2LH 1	1	1		1					2	2		2
		B2LH 0.9	1	1		1				4	1		1					2	1		1					3	1		1
			2	1		1				5	2		2					3	1		1					4	2		2
			3	1		1			B3RH 0.8	1	1		1					4	2		2					5	1		1
			4	1		1				2	1		1					5	1		1				B2RH 0.8	1	1		1
			5	1		1				3	1		1					6	2		2					2	1		1
			6	ND		ND				4	1		1					7	1		1					3	2		2
			7	1		1				5	1		1				B2RH 1	1	2		2					4	1		1
		B2RH 0.9	1	1		1				6	ND		ND					2	2?		2					5	1		1
			2	1		1			B4LH 0.8	1	1		1					3	1		1				B4LH 0.9	1	1		1
			3	1		1				2	1		1					4	1		1					2	1		1
			4	1		1				3	1		1					5	1		1					3	1		1
			5	2?		2				4	2?		2					6	1		1					4	1		1
			6	1		1				5	1		1					7	2?		2					5	2?		2
			7	1		1			B4RH 0.8	1	1		1				B3LH 1	1	1		1					6	1		1
		B3LH 0.8	1	1		1				2	1		1					2	1		1					7	1		1
			2	1		1				3	2		2					3	1		1				B4RH 0.9	1	2		2
			3	1		1				4	1		1					4	1		1					2	1		1
			4	1		1				5	1		1					5	2		2					3	1		1
			5	1		1				6	1		1					6	1		1					4	1		1
			6	1		1				7	1		1				B3RH 1	1	1		1				B5LH 0.9	1	2?		2
		B3RH 0.9	1	1		1			B7LH 1x	1	1		1					2	1		1					2	2		2
			2	1		1				2	1		1					3	1		1					3	2		2
			3	1		1				3	1		1					4	1		1					4	1		1
			4	2		2				4	1		1					5	1		1					5	1		1
		B4LH 0.9	1	1		1				5	1		1				B4LH 1	1	1		1				B5RH 0.9	1	1		1
			2	1		1				6	ND		ND					2	2?		2					2	2		2
			3	2		2			B7RH 1x	1	1		1					3	1		1					3	1		1
			4	1		1				2	1		1					4	2		2					4	2		2
			5	2		2				3	1		1				B4RH 1	1	1		1					5	1		1
		B5LH 1	1	1		1				4	1		1					2	1		1					6	1 o 2?		2
			2	1		1				5	ND. 1?		ND					3	2		2					7	0 o 1		ND
			3	1		1				6	ND. 1?		ND					4	1		1				B6LH 0.9	1	1		1
			4	1		1			B9LH 0.7	1	1		1					5	1		1					2	1		1
			5	1		1				2	2		2					6	1		1					3	1		1
			6	1		1				3	1		1					7	1		1					4	1		1
			7	ND		ND				4	1		1				B5LH 1	1	2?		2				B6RH 0.9	1	1		1
		B5RH 1	1	1		1				5	1		1					2	2		2					2	1		1
			2	1		1				6	ND		ND					3	2		2					3	2		2
			3	1		1			B9RH 0.7	1	1		1					4	2		2				B7LH 0.8	1	1		1
			4	1		1				2	1		1					5	2		2					2	1		1
			5	1		1				3	1		1				B5RH 1	1	1		1					3	2?		2
			6	1		1				4	1		1					2	1		1					4	1		1
			7	ND		ND				5	1		1					3	1		1					5	1		1
		B6LH 1	1	1		1				6	1		1					4	2		2				B8LH 0.9	1	1		1
			2	1		1				7	1		1					5	1		1					2	1		1
			3	1		1			B10LH 0.9	1	1		1					6	1		1					3	1		1
			4	1		1				2	1		1				B6LH	1	1		1					4	1		1
			5	1		1				3	1		1					2	1		1					5	1		1
			6	1		1				4	1		1					3	1		1					6	1		1
			7	ND		ND				5	1		1					4	1		1				B8RH 0.9	1	1		1
		B6RH 0.9	1	1		1				6	1		1					5	1		1					2	1		1
			2	1		1			B10RH 0.9	1	1		1					6	2?		2					3	1		1
			3	1		1				2	1		1					7	2		2					4	1		1
			4	1		1				3	1		1				B6RH	1	1		1					5	2		2
			5	2		2				4	1		1					2	2		2					6	2		2
			6	ND		ND				5	1		1					3	1		1				B9RH 0.9	1	1		1
		B7LH 0.9	1	1		1				6	2		2					4	1		1					2	1		1
			2	1		1				7	2?		2					5	1		1					3	2		2
			3	1		1			B11LH 0.9	1	1		1					6	2		2					4	1		1
		B7RH 0.9	1	1		1				2	1		1					7	1		1					5	2?		2
			2	1		1				3	2		2				B7LH	1	2?		2					6	1		1
			3	1		1				4	1		1					2	1		1				B10LH 0.9	1	2		2
			4	1		1				5	1		1					3	1		1					2	1		1
		B8LH 0.9	1	1		1				6	1		1					4	1		1					3	1		1
			2	2		2				7	1		1				B7RH	1	1		1					4	1		1
			3	2		2			B11RH 0.9	1	1		1					2	1		1					5	2		2
			4	1		1				2	1		1					3	1		1					6	1		1
			5	1		1				3	1		1					4	1		1				B10RH 0.9	1	2		2
		B8RH 0.9	1	1		1				4	ND		ND					5	1		1					2	1		1
			2	2		2				5	1		1					6	1		1					3	1		1
			3	2		2				6	1		1				B8RH	1	1		1					4	2		2
			4	1		1				7	ND		ND					2	1		1					5	1		1
			5	1		1			B12LH 0.9	1	1		1					3	2?		2				B11LH 0.9	1	1		1
			6	ND		ND				2	2?		2					4	1		1					2	1		1
		B9LH 1x	1	1		1				3	1		1					5	3?		3					3	1		1
			2	1		1				4	1		1				B9LH	1	1		1					4	1		1
			3	1		1				5	1		1					2	1		1					5	2		2
			4	1		1				6	1		1					3	1		1					6	1		1
			5	1		1				7	1		1					4	1		1				B11RH 0.9	1	1		1
		B9RH 1x	1	1		1			B12RH 0.9	1	1		1					5	1		1					2	1		1
			2	1		1				2	2?		2				B9RH	1	2?		2					3	2???		2
			3	2		2				3	3?		3					2	1		1					4	1		1
			4	1		1				4	1		1					3	1		1				B12LH 0.8	1	2		2
			5	1		1				5	1		1					4	ND 1		1					2	2		2
		B10LH 1x	1	1		1				6	1		1					5	1		1					3	ND		ND
			2	1		1				7	ND		ND					6	1		1					4	1		1
			3	1		1			B13LH 0.9	1	1		1					7	1		1					5	2		2
			4	1		1				2	1		1				B10RH	1	1		1					6	1		1
			5	1		1				3	1		1					2	2?		2					7	1		1
			6	1		1				4	1		1					3	1		1				B12RH 0.8	1	2		2
		B10RH 1x	1	1		1				5	2		2				B12LH	1	2?		2					2	2		2
			2	1		1				6	1		1					2	2		2					3	1		1
			3	1		1			B13RH 0.9	1	2		2					3	1		1					4	1		1
			4	1		1				2	1		1					4	1		1					5	1		1
			5	1		1				3	1		1					5	1		1					6	1		1
		B11LH 0.9	1	2		2				4	2		2				B12RH	1	1		1				B13LH 0.8	1	1		1
			2	1		1				5	1		1					2	2		2					2	1		1
			3	2?		2				6	1		1					3	1		1					3	1		1
			4	1		1			B14LH 0.9	1	2?		2					4	2?		2					4	1		1
			5	1		1				2	1		1					5	1		1					5	1		1
			6	1		1				3	2		2					6	ND		ND					6	1		1
			7	2		2				4	2?		2				B13LH	1	1		1				B14LH 0.8	1	2		2
		B11RH 0.9	1	1		1				5	1		1					2	2		2					2	1		1
			2	1		1				6	1		1					3	1		1					3	2		2
			3	1		1			B14RH 0.9	1	1		1					4	1		1					4	1		1
			4	2		2				2	1		1					5	1		1					5	1		1
			5	1		1				3	1		1					6	2		2					6	2		2
			6	1		1				4	1		1				B13RH	1	2		2				B15LH 0.8	1	1		1
			7	1		1				5	1		1					2	1		1					2	1		1
		B12LH 1x	1	1		1				6	1		1					3	2		2					3	1		1
			2	2		2				7	1		1					4	1		1					4	2		2
			3	1		1			B15LH 0.9	1	1		1				B14LH	1	1		1					5	1		1
			4	1		1				2	2		2					2	2?		2					6	ND		ND
			5	2		2				3	1		1					3	2		2				B15RH 0.9	1	1		1
			6	1		1				4	1		1					4	2		2					2	1		1
		B12RH 1x	1	1		1				5	1		1					5	1		1					3	1		1
			2	1		1				6	ND 1		2				B14RH	1	1		1					4	1		1
			3	1		1				7	ND 1		ND 1					2	1		1				B17LH 0.9	1	1		1
			4	1		1			B15RH 0.9	1	1		1					3	1		1					2	1		1
			5	1		1				2	2		2					4	1		1					3	1		1
			6	1		1				3	2		2				B15LH	1	1		1				B17RH 0.9	1	1		1
		B13LH 0.9	1	2		2				4	2		2					2	2?		2					2	1		1
			2	1		1				5	1		1					3	1		1					3	1		1
			3	1		1				6	1		1					4	1		1					4	1		1
			4	1		1			B16LH 0.9	1	1		1					5	2		2					5	2		2
			5	1		1				2	2?		2				B15RH	1	2		2					6	1		1
			6	2		2				3	1 Metaphase?		1					2	1		1
		B15LH 1x	1	1		1			B16RH 0.9	1	1		1					3	1		1
			2	2		2				2	1		1					4	1		1
			3	1		1				3	2		2					5	1		1
			4	2?		2				4	1		1					6	2		2
			5	1		1				5	ND		ND				B16LH	1	2		2
			6	1		1				6	ND		ND					2	1		1
			7	1		1			B17LH 0.9	1	2		2					3	1		1
		B15RH 1x	1	1		1				2	1		1					4	1		1
			2	1		1				3	2		2				B16RH	1	1		1
			3	1		1				4	2		2					2	2		2
			4	2		2				5	2		2				B17LH	1	2		2
			5	2		2				6	1		1					2	1		1
			6	1		1				7	1		1					3	1		1
			7	1		1			B17RH 0.9	1	1		1				B17RH	1	3? 2		3
		B16LH 0.9	1	2		2				2	1		1					2	1 3?		3
			2	1		1				3	1		1					3	2?		2
			3	1		1				4	2		2					4	1		1
			4	2		2				5	1		1					5	2		2
			5	1		1				6	2		2				B19LH	1	1		1
			6	ND		ND				7	1		1					2	2		2
		B16RH 0.9	1	1		1			B18RH 0.9	1	2		2					3	2		2
			2	2		2				2	1		1					4	2		2
			3	1		1				3	2		2					5	1		1
			4	2		2				4	1		1				B19RH	1	2		2
			5	1		1				5	1		1					2	1		1
			6	1		1				6	2?		2					3	1		1
			7	2		2
		B17LH 0.9	1	1		1
			2	1		1
			3	1		1
			4	1		1
			5	1		1
			6	1		1
			7	1		1
		B17RH 0.9	1	1		1
			2	1		1
			3	1		1
			4	1		1
			5	1		1
			6	1		1
			7	1		1
		B18LH 0.9	1	1		1
			2	1		1
			3	2		2
			4	1		1
			5	1		1
			6	1		1
		B18RH 0.9	1	1		1
			2	1		1
			3	1		1
			4	1		1
			5	1		1
		B19LH 0.9	1	1		1
			2	1		1
			3	1		1
			4	1		1
			5	1		1
			6	1		1
		B19RH 0.9	1	1		1
			2	1		1
			3	1		1
			4	1		1
			5	1		1
