# Supplementary material for: Human RAP2A homolog of the Drosophila asymmetric cell division regulator Rap2l targets the stemness of glioblastoma stem cells
Source: eLife. 2025 Nov 28;14:RP105690. doi: 10.7554/eLife.105690 (PMC12662630; doi:10.7554/eLife.105690)
Supplement: Figure 2—source data 1. [file elife-105690-fig2-data1.xlsx]

## Sheet: Sheet1
		WorGal4 Ase80; mCD8GFP x W										WorGal4 Ase80; mCD8GFP x UAS-RNAi Rap2L
		Brain	Clon	NB (Dpn+[BIG])	Total Dpn+		mINP (Dpn+Ase+)	Ase+/Dpn-	Ratio Ase+/ mINPs			Brain	Clon	NB (Dpn+[BIG])	Total Dpn+		mINP (Dpn+Ase+)	Ase+/Dpn-
		B1R	1	1	1		12	12	1			R1R	3	1	1		12	14	1.16667
		B1R	2	1	1		11	14	1.27273			R1R	4	1	1		15	14	0.933333
		B1R	3	1	1		13	16	1.23077			R1R	5	2	2		14	17	1.21429
	DL	B1R	4	1	2		7	11	1.57143			B2R	1	1	1		ND	ND	#VALUE!
	DL	B1R	5	1	1		4	5	1.25			B2R	2	1	1		ND	ND	#VALUE!
		B1R	6	1	1		16	15	0.9375			B2R	3	1	1		21	20	0.952381
		B1R(2)	7	1	1		17	15	0.882353			B2R	4	1	1		20	15	0.75
		B1R(2)	8	1	1		13	17	1.30769			B2R(2)	6	2	2		13	20	1.53846
		B2R	1	1	1		15	16	1.06667			B3R	1	1	1		13	19	1.46154
		B2R	2	1	1		25	17	0.68			B3R	2	1	1		14	18	1.28571
		B2R	3	1	1		9	15	1.66667			B3R	3	1	1				#DIV/0!
		B2R	4	1	1		17	13	0.764706		DL?	B3R	4	1	1		8	12	1.5
		B2R(2)	8	1	1		17	22	1.29412		DL	B3L	1	1	1		5	7	1.4
	DL	B2L	1	1	1		7	9	1.28571		DL	B3L	2	1	1		9	10	1.11111
	DL	B2L	2	1	1		4	5	1.25			B3L	3	1	1		15	21	1.4
		B2L	3	1	1		19	25	1.31579			B3L	4	1	1		18	25	1.38889
		B2L	4	1	1		18	26	1.44444			B3L	5	1	1		19	21	1.10526
		B2L	5	1	1		18	19	1.05556			B5R	1	1	2	(-)	15	20	1.33333
		B2L	6	1	1		13	13	1			B5R	2	1	2	(-)	9	12	1.33333
		B2L	7	1	1		17	26	1.52941			B5R	3	1	2	(-)	16	19	1.1875
		B3R	2	1	1		26	23	0.884615			B5R	4	1	1		19	21	1.10526
		B3R	3	1	1		23	22	0.956522			B5R	5	2	2		6	9	1.5
		B3R	4	1	1		24	21	0.875			B5L	1	2	2		7	9	1.28571
		B3L	1	1	1		16	21	1.3125			B5L	2	1	2	(-)	3	8	2.66667
		B3L	2	1	1		16	28	1.75			B5L	3	1	2	(-)	13	14	1.07692
		B3L	3	1	2	(--)	17	27	1.58824			B5L	4	2	2		22	27	1.22727
		B3L	7	1	1		19	24	1.26316			B5L	5	2	2		23	23	1
	Total											B5L	6	1	2	(-)	16	19	1.1875
	Average			1	1.07407		17	19.4348				B6L	1	1	1		9	11	1.22222
	SD				0.26688							B6L	3	1	1		23	21	0.913043
	Varianza						33.8319					B6L	4	1	2	(-)	15	22	1.46667
	N (Clons)			27								B6L	5	1	2		15	17	1.13333
	defects			0	1							B6L	6	1	1		23	27	1.17391
	%			0	3.7037							B6L	7	2	3		25	26	1.04
											Total
											Average			1.20588	1.47059		17	19.6667
											SD				0.563285
											Varianza						33.6925
											N (Clons)			34
											defects			7	15
											%			20.5882	44.1176
			NBs
		Control	1.07407	0.26688
		Rap2L RNAi	1.48485	0.565752
	T Test						12										12
							11										15
t-Test: Two-Sample Assuming Equal Variances							13										14
							7										21
	Variable 1	Variable 2					4										20
Mean	15.2963	14.6774					16										13
Variance	33.8319	33.6925					17										13
Observations	27	31					13										14
Pooled Variance	33.7572						15										8
Hypothesized Mean Difference	0						25										5
df	56						9										9
t Stat	0.404641						17										15
P(T<=t) one-tail	0.343641						17										18
t Critical one-tail	1.67252						7										19
P(T<=t) two-tail	0.687283						4										15
t Critical two-tail	2.00324						19										9
							18										16
							18										19
							13										6
							17										7
							26										3
							23										13
							24										22
							16										23
							16										16
							17										9
							19										23
																	15
																	15
																	23
																	25
