# Supplementary material for: Human RAP2A homolog of the Drosophila asymmetric cell division regulator Rap2l targets the stemness of glioblastoma stem cells
Source: eLife. 2025 Nov 28;14:RP105690. doi: 10.7554/eLife.105690 (PMC12662630; doi:10.7554/eLife.105690)
Supplement: Figure 2—source data 2. [file elife-105690-fig2-data2.xlsx]

## Sheet: Sheet1
	NBs		INPs
	OK	Failures	OK	Failures
Control B1LH			8	2
Control B1RH			3	0
Control B2LH			5	0
Control B2RH			5	1
Control B3LH			7	1
Control B3RH			6	1
Control B4RH			6	2
Control B5LH			7	1
Control B5RH			6	1
Control B6LH			4	0
Control B8LH			6	1
Control B8RH			7	1
Control B10LH			9	2
Total			79	13
			92
%			85.8696	14.1304

## Sheet: Sheet2
	NBs		INPs
	OK	Failures	OK	Failures
Rap2L-RNAi B2LH			5	3
Rap2L-RNAi B2RH			6	2
Rap2L-RNAi B3LH			8	2
Rap2L-RNAi B3RH			7	2
Rap2L-RNAi B4LH			4	0
Rap2L-RNAi B4RH			4	1
Rap2L-RNAi B5LH			3	2
Rap2L-RNAi B5RH			4	1
Rap2L-RNAi B6LH			6	2
Rap2L-RNAi B6RH1			3	2
Rap2L-RNAi B6RH2
Rap2L-RNAi B7LH1			3	0
Rap2L-RNAi B7LH2			2	0
Rap2L-RNAi B7RH			5	3
Rap2L-RNAi B8LH			4	1
Rap2L-RNAi B8RH			3	1
Total			67	22
			89
			75.2809	24.7191
