# Supplementary material for: Human RAP2A homolog of the Drosophila asymmetric cell division regulator Rap2l targets the stemness of glioblastoma stem cells
Source: eLife. 2025 Nov 28;14:RP105690. doi: 10.7554/eLife.105690 (PMC12662630; doi:10.7554/eLife.105690)
Supplement: Figure 2—source data 3. [file elife-105690-fig2-data3.xlsx]

## Sheet: Sheet1
	Failures				WorGal4 Ase80; mCD8GFP x W															WorGal4 Ase80; mCD8GFP x UAS-Rap2L RNAi
	Control	4 brains	7 hemispheres				Metaphase						Interphase									Metaphase						Interpahse
		25 meta	3 failures				NB			INP			NB			INP						NB			INP			NB			INP
			In 3 hemispheres of 3 brains					Defects			Defects			Defects			Defects						Defects			Defects			Defects			Defects
					Brain	Clon		Absent	Cortical		Absent	Cortical		Absent	Cortical		Absent	Cortical		Brain	Clon		Absent	Cortical		Absent	Cortical		Absent	Cortical		Absent	Cortical
	Rap2A	6 brains	9 hemispheres		B2LH	1				2 (1 OK)		1	+	+						B1RH	1	+ early			1
		27 neta	14 failures			2							+		+ dot low						2							+	+
			In7 hemispheres of 5 brains			3							+		+ dot low						5	ND			1	+		ND
						4							+	+							6							+	+
						5							+	+						B1LH	1				1 ND			+	+
						6				1			+	+							2				2			+	+
					B2RH	1							+	+							3				1			+	+
						2							+	+							4				0			+	+
						3							+	+							5				0			+		+
						4							+		low Apical						6				0			+		+
						5				1			+		low Apical					B2LH	1							+	+
					B3LH	1				1			+		low Apical						2							+		low
						2				2			+	+							3							+		+
						3				1			+	+							4							+		+
						4				1			+	+							5	+	+	+
						5	+			2 (1 OK)		1								B3RH	1				1	+	-	+	+
						6				2			+	+							2	ND, Early	+		1
						7				0			+		low Apical						3				0			+	+
					B3RH	1				1			+		dots						4	ND			0
						2				0			+	+							5	+	MissLocalized		0
						3				1 late			+	+							6	ND			1
						4				1			+		low					B3LH	1	ND			0
						5	+			0											2				1	no con centrosoma		+	+
						6	+			2											3	ND			0
					B5LH	2				1		+									4	+	+	+ low	1	+
						4				1											5	ND			1	+
					B7RH	3				1											6	ND			0
					B7LH	1				1										B4RH	1				0			+	+	+
					Metafases		3			22			Metafases T	Fallos T	% Met con fallos						2	ND			0			ND
					Fallos			0	0%		0	3									3	ND			0			ND
					Totales							13,6%	25	3	12						4				1	+	+	+	+	-
																					5				0			+	+	-
															=(3*100)/25						6				0			+	+	low
																				B4LH	1				1			+	+
																					2	ND			1	+	+	ND
																					3				0			+	?	+
																					4	ND			1	+		ND
																					5	ND			1	no con centrosoma		ND
																				B5RH	1	ND			0			ND
																					2				3	2+		+	+
																					3				2			+	+
																					4				0			+	+
																					5				0			+	+
																					6	ND			0			ND
																				B6RH	1	ND						ND
																					2							+		+
																					3	+
																					4	ND						ND
																					5							+	+	-
																					6							+	+	-
																					7							+	+	-
																				Metafases		5			22			Metafases T	Fallos T	% Met con fallos
																				Fallos			3			11
																				Totales			60%			50%		27	14	51.8
