# Supplementary material for: Human RAP2A homolog of the Drosophila asymmetric cell division regulator Rap2l targets the stemness of glioblastoma stem cells
Source: eLife. 2025 Nov 28;14:RP105690. doi: 10.7554/eLife.105690 (PMC12662630; doi:10.7554/eLife.105690)
Supplement: Figure 2—source data 4. [file elife-105690-fig2-data4.xlsx]

## Sheet: Sheet1
								brain	clon	Prometaph	Metaphase	Anaphase	Crescent	Cortical	AJ	Citop	Visible	(+)	Visible	(+)	DNA					brain	clon	Prometaph	Metaphase	Anaphase	Crescent	Cortical	AJ	Citop	Visible	(+)	Visible	(+)	DNA
	Failures							WorGal4 AseGal80; mCD8GFP x W-																		WorGal4 AseGal80; mCD8GFP x Rap2L RNAi
	Control	6 brains	11 hemispheres					Brain	Clon	Phase			Localization													Brain	Clon	Phase			Localization
		37 meta	4 failures							Prometaph	Metaphase	Anaphase	Crescent	Cortical	AJ	Citop	1 Centros		2 centros		DNA							Prometaph	Metaphase	Anaphase	Crescent	Cortical	AJ	Citop	1 Centros		2 centros		DNA
			In 4 hemispheres of 4 brains														Visible	(+)	Visible	(+)															Visible	(+)	Visible	(+)
					Pictures 03082021			B4LH	3.1		+		+												Max 18-19	B1RH	4		+ Early		+						+		-
	Rap2A	4 brains	7 hemispheres						3.2		+		+												Max 13-15		5		+ Early		+				+				-
		39 meta	12 failures				Max16-20	B5LH	6		+		+ low			+											6.1		+		+
			In 6 hemispheres of 3 brains						2.1		+		+														6.2		+		+
									3.1		+		+													B2RH	1		+		-	- (Absent)		+ low			+		+
									7.1		+		+ ?												Max 11-13		4		+ Early		-	- (Absent)		+			+		-
								B4RH	ND																		1.1		+		+
								B3RH	2.1		+		+														1.2		+		-	- (Absent)
								B2RH	4		+ Late		+ (+GMC)			+											5.1		+		+
								B2LH	1		+ Late		+ (+GMC)														6.1		+		+
									3.1		+		+														6.2		+		-	- (Absent)
									5.1		+		+														6.3		+		+
							Bad position	B3LH	5		+		+												Max 5-7	B2LH	1.1		+		? Very low	Absent?
									3.1		+		-	+													2.1		-		-	+ High	Just divided from NB??		+
									4.1		+		+														2.2		+		+
									4.2		+		+														2.3		+		+ Low
							Max 7-9		5.1		+		+														3.1		+		+
							Max 5-10	B5RH	4		+		+										Pictures 20082021			B1RH	1.1		+		+
									1.1		+		+														1.2		+		-	- (Absent)
									1.2		+		?	+													2.1		+		+
									1.3		+		+														2.2		+		+
								B6LH	2		+		+ enriched														5.1		+		-	- (Absent)
									1.1		+		+												Max 5-6	B1LH	5		-		- Basal enriched						+		-
									1.2		+		+												Max 5-9		3.1		+		-?
									1.3		+		+														3.2		+		-	- (Absent)
							Max 9-10		5.1		+		+												Max 7-8		5.1		+		+ (dots)
									5.2		+		+													B2RH	ND
									7.1		+		+ low ?													B17LH	1.1		+		-	- (Absent)
									8.1		+ late		-	+ low							-						1.2		+		+
							Max 13-15	B6RH	1.1		+		+														1.3		+		+
									1.2		+		+														1.4		+		-	- (Absent)
									3.1		+		+	? Low													3.1		+		-	- (Absent)
									4.1		ND																4.1		+		+
									6.1		+		+														5.1		+		+
					Pictures 10112021		Max 5-8	B2RH	4		+		+											Bad position	Max 9-13	B17RH	6		+		+
							z9		2.1		+		+														5.1		+		+
									4.1		+	ND muy juntos													B16LH		1.1		+		+ Low
									4.2		+																1.2		+ ND
									5.1		+		+														2.1		+		+
								B2LH	2.1		+		+ high	+ Low													3.1		+		-	- (Absent)
							Max 7-8		3.1		+		+ high														4.1		+		+ dots
								B3RH	ND	Bad pictures																	5.1		+		-	- (Absent)
								B3LH	ND
											failures																		Failures
							total counted		37		4														total counted		39		12
