# Supplementary material for: Human RAP2A homolog of the Drosophila asymmetric cell division regulator Rap2l targets the stemness of glioblastoma stem cells
Source: eLife. 2025 Nov 28;14:RP105690. doi: 10.7554/eLife.105690 (PMC12662630; doi:10.7554/eLife.105690)
Supplement: Figure 3—source data 1. [file elife-105690-fig3-data1.xlsx]

## Sheet: NewData (100points -Background)
	GB5GFP	GB5Rap2A
	New Gray Value	New Gray Value
	175.450	51.587
	139.685	51.285
	134.520	50.427
	129.962	49.637
	127.359	47.733
	126.178	46.714
	124.656	43.890
	116.452	43.213
	115.724	43.095
	114.372	41.384
	108.544	40.970
	107.001	39.140
	106.565	38.418
	104.631	38.045
	102.991	36.983
	102.589	36.933
	102.269	36.132
	101.801	35.565
	101.620	35.176
	101.225	34.811
	99.431	34.613
	99.382	34.571
	99.151	34.226
	98.452	33.696
	98.160	33.233
	95.884	33.070
	95.842	32.702
	95.064	32.333
	94.234	31.563
	93.533	31.516
	93.378	31.230
	93.319	31.152
	92.669	30.612
	91.150	30.364
	90.478	29.823
	90.312	29.685
	90.292	29.346
	89.078	29.268
	88.929	29.031
	88.392	28.141
	87.649	27.561
	87.346	27.245
	86.909	27.209
	86.269	27.113
	86.238	27.016
	85.915	26.625
	85.759	26.425
	85.723	25.926
	85.687	25.622
	85.409	25.438
	85.358	25.245
	84.847	25.221
	84.354	24.755
	82.768	24.601
	82.282	24.498
	81.668	24.354
	81.609	24.332
	80.936	24.240
	80.810	23.725
	80.699	23.292
	78.500	23.248
	78.020	23.193
	77.775	22.975
	77.553	22.826
	77.342	22.822
	76.850	22.625
	76.349	22.527
	75.592	22.132
	75.409	22.067
	75.334	21.913
	74.763	21.820
	74.627	21.741
	73.866	21.571
	73.404	21.334
	73.259	21.313
	73.234	21.026
	73.125	21.023
	73.004	20.979
	72.547	20.920
	72.450	20.620
	72.434	20.608
	69.905	20.582
	69.187	20.462
	69.108	20.387
	68.931	20.207
	68.893	20.142
	68.734	20.139
	68.311	20.010
	68.175	19.928
	68.089	19.769
	67.920	19.745
	67.831	19.565
	67.568	19.399
	67.058	19.382
	66.534	19.376
	66.470	19.137
	66.048	19.038
	65.890	18.994
	65.585	18.934
	65.413	18.885

## Sheet: NewData (All data - Background)
	GB5GFP	GB5Rap2A
	New Gray Value	New Gray Value
	25.508	11.113
	67.92	3.11741
	64.553	-1.01039
	59.603	3.57551
	24.385	3.84321
	22.657	8.59491
	21.847	6.85621
	13.119	2.80871
	32.266	2.76401
	33.926	0.646407
	38.046	5.84031
	25.419	1.25151
	6.716	2.19581
	7.144	-0.309793
	2.821	0.698307
	7.867	3.51041
	11.459	2.00801
	7.187	2.10321
	16.206	1.43291
	6.654	7.93601
	16.191	1.81101
	41.311	1.23871
	36.685	8.21821
	25.458	2.93351
	28.273	8.58591
	20.732	18.097
	12.142	10.4607
	28.975	7.66231
	15.872	9.97911
	28.883	6.58221
	33.033	11.6661
	60.61	9.74751
	66.048	8.88551
	61.579	3.10471
	55.763	6.36031
	48.654	7.87161
	48.935	4.36651
	74.763	5.05731
	75.592	3.11421
	76.85	8.20141
	74.627	18.4188
	80.81	7.02621
	101.62	4.05571
	73.004	7.79991
	54.557	4.32021
	42.58	6.48511
	36.819	7.53531
	26.11	9.52951
	94.234	11.3709
	25.171	19.1373
	37.014	10.267
	46.241	15.2351
	17.279	5.51381
	18.163	9.09481
	11.908	15.5991
	30.342	10.8032
	33.887	13.0974
	9.754	12.9147
	23.382	12.8728
	19.5	13.6486
	26.808	11.4733						Group1 contains 7 potential outliers, which is 1.92% of the observations.
	44.097	7.75941						Group2 contains 19 potential outliers, which is 4.38% of the observations.
	40.112	7.19731
	8.929	20.2072						Mann Whitney U test is robust to the presence of outliers, more robust than the t-test
	37.275	18.5578
	40.805	16.7277
	60.552	15.3785
	34.193	8.29081
	43.123	18.7615
	46.77	16.2335
	42.73	19.3824
	39.22	14.1226
	44.379	7.58121
	42.225	6.55451
	36.292	10.9593
	33.444	9.96161
	33.068	7.53861
	29.164	8.94891
	38.486	11.3651
	25.593	13.2326
	42.381	4.59911
	32.648	2.32701
	36.553	2.05021
	26.691	4.57751
	28.96	2.09551
	66.47	15.5698
	55	13.8966
	30.533	15.7467
	32.962	26.6251
	27.384	33.0703
	28.714	28.1408
	40.406	32.7024
	38.778	36.9333
	17.588	30.3643
	19.264	34.571
	56.563	43.2127
	49.649	29.8231
	27.778	38.0452
	21.92	34.8111
	21.921	38.4181
	33.641	51.5871
	30.343	49.6365
	35.711	50.427
	26.929	43.8895
	30.528	36.9829
	24.064	29.268
	33.583	17.1334
	19.596	17.102
	11.828	16.6293
	9.095	13.7823
	26.484	12.8647
	35.843	14.8185
	48.085	22.8257
	39.345	12.7083
	16.869	10.1901
	28.815	9.24591
	42.839	12.3075
	46.812	14.6856
	33.083	11.6488
	41.943	14.2426
	52.003	5.54901
	36.349	6.82621
	25.772	26.4248
	36.515	13.026
	26.33	20.1424
	17.807	9.64341
	15.268	6.75261
	29.181	10.941
	68.089	15.2666
	55.207	13.1915
	49.612	10.525
	47.918	5.01801
	35.702	3.77891
	62.492	6.85061
	56.981	6.22271
	41.613	4.27801
	72.434	5.34291
	86.238	6.44371
	61.268	8.77851
	42.126	3.57991
	57.618	9.34921
	38.359	3.02101
	67.831	3.31461
	65.89	4.01431
	87.649	8.11301
	102.991	11.4408
	90.292	6.95991
	63.759	10.7031
	104.631	5.80411
	99.151	10.3663
	95.842	13.5364
	127.359	18.2864
	134.52	11.2619
	175.45	11.0395
	126.178	9.24771
	139.685	4.66011
	124.656	9.66011
	88.392	11.8159
	102.269	6.41791
	77.553	13.1937
	99.431	9.81991
	108.544	6.78641
	72.45	10.3718
	91.15	14.6223
	116.452	17.3413
	95.884	16.389
	54.369	21.5711
	93.533	27.209
	78.02	4.91811
	73.866	12.6445
	62.46	15.6704
	64.917	20.9203
	68.734	8.57551
	53.412	11.5366
	47.31	6.20931
	67.058	12.7655
	56.048	16.261
	63.563	6.95171
	46.472	7.22391
	63.622	18.9939
	51.821	10.4521
	38.408	11.3958
	62.138	8.76781
	48.636	6.10401
	47.97	1.46231
	36.035	3.09881
	24.635	11.1096
	29.049	4.46701
	14.164	11.1826
	24.503	24.3544
	51.132	4.13351
	19.127	8.70591
	35.228	10.3574
	26.915	10.7741
	45.89	7.88621
	28.117	1.27311
	25.695	3.98771
	32.292	2.66981
	12.455	3.79431
	21.508	0.445507
	30.136	2.25851
	36.686	5.95101
	24.208	5.43181
	55.75	2.51631
	53.378	-0.494293
	62.027	1.40411
	75.334	10.059
	51.625	13.3422
	66.534	9.00081
	80.936	9.26751
	57.967	6.36841
	75.409	8.95921
	68.893	9.48131
	56.906	9.67011
	65.109	13.4357
	59.182	12.0116
	53.2	2.85341
	56.215	12.1433
	63.732	4.76221
	65.413	5.45651
	88.929	12.5125
	82.282	8.53531
	85.723	9.58321
	81.668	8.91601
	98.16	5.07811
	86.269	3.41071
	98.452	4.50301
	82.768	8.61221
	34.784	0.621907
	57.072	-0.304593
	72.547	4.48481
	69.905	4.21161
	56.057	-1.59229
	35.04	-0.270193
	42.234	-2.78769
	45.376	5.65721
	49.23	3.29581
	16.357	1.10991
	30.903	-1.85099
	37.671	2.08821
	50.806	6.20061
	40.085	5.83221
	38.474	12.9736
	42.637	7.76151
	51.128	7.34521
	48.611	10.5075
	47.887	11.3521
	53.97	6.44531
	57.631	5.52111
	73.125	15.4659
	73.259	19.7692
	85.687	9.21181
	77.342	12.4424
	76.349	17.1365
	87.346	15.0551
	99.382	15.0565
	85.915	10.5402
	102.589	6.21291
	95.064	11.0549
	90.478	17.0477
	58.929	9.08781
	68.931	9.27831
	57.494	25.9258
	84.847	14.5395
	93.319	12.8656
	78.5	16.7187
	53.022	14.0325
	53.814	20.3871
	42.523	14.8058
	40.763	18.0422
	30.28	20.5815
	41.316	21.3337
	46.091	17.6088
	29.28	39.1398
	50.623	32.3331
	42.348	13.1483
	52.762	9.21771
	53.753	30.612
	61.396	16.8799
	52.993	23.193
	44.947	18.2262
	62.957	16.9133
	65.585	14.287
	68.175	18.0887
	32.55	27.5611
	38.346	24.2396
	43.03	19.7452
	40.777	20.139
	59.791	20.6076
	85.358	27.016
	85.759	14.779
	69.108	11.6704
	58.334	11.6684
	69.187	5.94521
	86.909	24.3321
	81.609	19.9283
	73.234	14.9654
	80.699	13.522
	61.645	18.5095
	50.335	20.0097
	90.312	11.1803
	62.507	18.0424
	101.801	20.9788
	59.87	11.4737
	68.311	11.1055
	56.161	18.5918
	67.568	15.654
	73.404	24.4983
	58.009	24.7547
	129.962	31.5158
	106.565	19.3989
	107.001	17.2809
	84.354	19.3759
	114.372	14.9801
	85.409	21.9125
	93.378	25.4375
	115.724	21.7407
	62.349	11.3453
	58.622	14.3898
	52.453	3.05581
	41.347	13.2473
	77.775	12.7391
	89.078	17.4855
	92.669	13.2437
	64.985	14.409
	101.225	8.92621
	56.499	14.6186
	56.312	21.0258
	51.542	5.50471
	36.534	9.44911
	32.525	23.2475
	45.889	25.2448
	43.086	18.8848
	34.159	12.1499
	27.666	35.1757
	29.06	31.2298
	47.009	25.6215
	37.74	31.1522
	30.278	13.8233
	30.194	13.2114
	37.496	20.6196
	61.419	22.9745
	34.274	17.0127
	30.543	9.60621
	24.804	9.10871
	31.918	14.4693
	32.721	17.1685
	21.505	12.548
	14.365	8.56731
	25.355	19.5648
	43.335	11.2519
	62.178	14.4088
	33.215	19.0383
	35.454	8.41491
	51.543	4.10991
	20.113	14.4004
	42.52	9.97831
	34.451	10.7398
	41.296	11.4406
	43.377	13.1985
	54.438	15.8403
	46.788	0.055007
	19.101	13.714
	18.088	11.8748
	16.339	11.2335
		10.3539
		1.71061
		3.24161
		-0.375993
		7.89301
		12.8055
		22.0671
		14.4386
		4.82671
		5.66371
		11.7949
		10.286
		4.00491
		15.5806
		14.7391
		4.32441
		8.28391
		20.4618
		22.5272
		29.3458
		16.0079
		18.9343
		41.3843
		46.7142
		21.3126
		16.939
		22.8223
		35.5647
		23.2917
		10.0013
		13.4971
		5.96831
		5.41301
		15.3276
		27.2447
		25.2207
		13.8844
		16.4814
		33.2327
		40.9696
		22.132
		22.6249
		24.6005
		18.8556
		43.0947
		23.7251
		33.6959
		34.6132
		27.1133
		18.0247
		16.4439
		21.0233
		14.2409
		8.14241
		7.52971
		16.098
		31.5627
		51.2849
		34.2264
		29.6849
		36.1317
		47.7331
		29.0312
		15.9991
		9.82011
		14.4227
		21.8195
		17.6355
		9.95341
