# Supplementary material for: Human RAP2A homolog of the Drosophila asymmetric cell division regulator Rap2l targets the stemness of glioblastoma stem cells
Source: eLife. 2025 Nov 28;14:RP105690. doi: 10.7554/eLife.105690 (PMC12662630; doi:10.7554/eLife.105690)
Supplement: Figure 3—source data 2. [file elife-105690-fig3-data2.xlsx]

## Sheet: Sheet1
GB5GFP Sox2	Label	Area	IntDen	Mean gray		GB5Rap2A Sox2	Label	Area	IntDen	Mean gray
5	GB5LVGFP Sox 2_Series002_z004_ch00.tif	72017	7568910	105.099		32	GB5LVRap2A Sox 2_Series002_z007_ch00.tif	47280	2489875	52.6623
7	GB5LVGFP Sox 3_Series003_z004_ch00.tif	20675	2947936	142.585		20	GB5LVRap2A Sox 1_Series004_z005_ch00.tif	12231	1494732	122.208
61	GB5LVGFP Sox 2_Series002_z004_ch00.tif	25080	2744662	109.436		1	GB5LVRap2A Sox 1_Series004_z005_ch00.tif	7263	895951	123.358
4	GB5LVGFP Sox 2_Series002_z004_ch00.tif	12946	1416555	109.42		4	GB5LVRap2A Sox 3_Series003_z004_ch00.tif	4294	606683	141.286
190	GB5LVGFP Sox 2_Series002_z004_ch00.tif	6711	1280526	190.81		6	GB5LVRap2A Sox 1_Series004_z005_ch00.tif	7138	574988	80.5531
1	GB5LVGFP Sox 2_Series002_z004_ch00.tif	6821	934864	137.057		12	GB5LVRap2A Sox 3_Series003_z004_ch00.tif	4144	457329	110.359
168	GB5LVGFP Sox 2_Series002_z004_ch00.tif	3950	656597	166.227		9	GB5LVRap2A Sox 3_Series003_z004_ch00.tif	5703	431161	75.6025
53	GB5LVGFP Sox 3_Series003_z004_ch00.tif	4888	528561	108.134		2	GB5LVRap2A Sox 3_Series003_z004_ch00.tif	3495	417121	119.348
14	GB5LVGFP Sox 2_Series002_z004_ch00.tif	2057	391302	190.229		11	GB5LVRap2A Sox 3_Series003_z004_ch00.tif	4374	410327	93.8105
166	GB5LVGFP Sox 2_Series002_z004_ch00.tif	3476	325211	93.559		8	GB5LVRap2A Sox 3_Series003_z004_ch00.tif	3249	406498	125.115
20	GB5LVGFP Sox 3_Series003_z004_ch00.tif	3164	300965	95.1217		13	GB5LVRap2A Sox 3_Series003_z004_ch00.tif	3031	260051	85.7971
11	GB5LVGFP Sox 3_Series003_z004_ch00.tif	2344	243809	104.014		25	GB5LVRap2A Sox 1_Series004_z005_ch00.tif	2563	216529	84.4826
186	GB5LVGFP Sox 2_Series002_z004_ch00.tif	884	194694	220.242		3	GB5LVRap2A Sox 3_Series003_z004_ch00.tif	1218	199332	163.655
46	GB5LVGFP Sox 3_Series003_z004_ch00.tif	1863	189321	101.622		7	GB5LVRap2A Sox 1_Series004_z005_ch00.tif	1858	199108	107.163
13	GB5LVGFP Sox 3_Series003_z004_ch00.tif	1583	181537	114.679		26	GB5LVRap2A Sox 1_Series004_z005_ch00.tif	1996	194827	97.6087
66	GB5LVGFP Sox 3_Series003_z004_ch00.tif	1139	175136	153.763		14	GB5LVRap2A Sox 3_Series003_z004_ch00.tif	2665	191774	71.9602
2	GB5LVGFP Sox 2_Series002_z004_ch00.tif	1670	173892	104.127		17	GB5LVRap2A Sox 1_Series004_z005_ch00.tif	1699	188433	110.908
64	GB5LVGFP Sox 3_Series003_z004_ch00.tif	779	106281	136.433		4	GB5LVRap2A Sox 1_Series004_z005_ch00.tif	1724	179158	103.92
65	GB5LVGFP Sox 3_Series003_z004_ch00.tif	887	100240	113.01		1	GB5LVRap2A Sox 3_Series003_z004_ch00.tif	1420	163018	114.801
55	GB5LVGFP Sox 2_Series002_z004_ch00.tif	1065	88229	82.8441		18	GB5LVRap2A Sox 1_Series004_z005_ch00.tif	1864	157577	84.537
12	GB5LVGFP Sox 3_Series003_z004_ch00.tif	875	74580	85.2343		22	GB5LVRap2A Sox 2_Series002_z007_ch00.tif	2265	138578	61.1823
57	GB5LVGFP Sox 2_Series002_z004_ch00.tif	890	72833	81.8348		28	GB5LVRap2A Sox 2_Series002_z007_ch00.tif	1296	105570	81.4583
159	GB5LVGFP Sox 2_Series002_z004_ch00.tif	911	71909	78.9341		33	GB5LVRap2A Sox 2_Series002_z007_ch00.tif	1646	96687	58.7406
42	GB5LVGFP Sox 3_Series003_z004_ch00.tif	703	66839	95.0768		89	GB5LVRap2A Sox 2_Series002_z007_ch00.tif	1336	75292	56.3563
36	GB5LVGFP Sox 3_Series003_z004_ch00.tif	739	58664	79.3829		74	GB5LVRap2A Sox 3_Series003_z004_ch00.tif	1062	73636	69.3371
160	GB5LVGFP Sox 2_Series002_z004_ch00.tif	502	55493	110.544		78	GB5LVRap2A Sox 2_Series002_z007_ch00.tif	762	69290	90.9318
44	GB5LVGFP Sox 2_Series002_z004_ch00.tif	735	54476	74.117		79	GB5LVRap2A Sox 3_Series003_z004_ch00.tif	1059	68998	65.1539
60	GB5LVGFP Sox 3_Series003_z004_ch00.tif	681	54073	79.4023		8	GB5LVRap2A Sox 1_Series004_z005_ch00.tif	804	66581	82.8122
53	GB5LVGFP Sox 2_Series002_z004_ch00.tif	703	50559	71.9189		3	GB5LVRap2A Sox 1_Series004_z005_ch00.tif	751	62048	82.6205
162	GB5LVGFP Sox 2_Series002_z004_ch00.tif	531	39769	74.8945		119	GB5LVRap2A Sox 2_Series002_z007_ch00.tif	971	60495	62.3018
23	GB5LVGFP Sox 2_Series002_z004_ch00.tif	417	27987	67.1151		23	GB5LVRap2A Sox 2_Series002_z007_ch00.tif	804	58119	72.2873
114	GB5LVGFP Sox 2_Series002_z004_ch00.tif	340	22213	65.3324		112	GB5LVRap2A Sox 2_Series002_z007_ch00.tif	842	50321	59.7637
4	GB5LVGFP Sox 3_Series003_z004_ch00.tif	119	9796	82.3193		69	GB5LVRap2A Sox 2_Series002_z007_ch00.tif	578	44628	77.2111
188	GB5LVGFP Sox 2_Series002_z004_ch00.tif	131	9334	71.2519		39	GB5LVRap2A Sox 3_Series003_z004_ch00.tif	444	28747	64.7455
177	GB5LVGFP Sox 2_Series002_z004_ch00.tif	134	8587	64.0821		15	GB5LVRap2A Sox 3_Series003_z004_ch00.tif	359	23120	64.4011
110	GB5LVGFP Sox 2_Series002_z004_ch00.tif	113	7586	67.1327		95	GB5LVRap2A Sox 2_Series002_z007_ch00.tif	521	22013	42.2514
118	GB5LVGFP Sox 2_Series002_z004_ch00.tif	102	6732	66		129	GB5LVRap2A Sox 2_Series002_z007_ch00.tif	493	21250	43.1034
69	GB5LVGFP Sox 3_Series003_z004_ch00.tif	74	4847	65.5		67	GB5LVRap2A Sox 3_Series003_z004_ch00.tif	158	9763	61.7911
						125	GB5LVRap2A Sox 2_Series002_z007_ch00.tif	211	9518	45.109
						69	GB5LVRap2A Sox 3_Series003_z004_ch00.tif	153	9184	60.0261
						48	GB5LVRap2A Sox 3_Series003_z004_ch00.tif	143	8520	59.5804
						9	GB5LVRap2A Sox 2_Series002_z007_ch00.tif	153	5937	38.8039
						53	GB5LVRap2A Sox 2_Series002_z007_ch00.tif	132	5620	42.5758
						12	GB5LVRap2A Sox 2_Series002_z007_ch00.tif	131	5377	41.0458
						116	GB5LVRap2A Sox 2_Series002_z007_ch00.tif	83	3476	41.8795
