# Supplementary material for: Human RAP2A homolog of the Drosophila asymmetric cell division regulator Rap2l targets the stemness of glioblastoma stem cells
Source: eLife. 2025 Nov 28;14:RP105690. doi: 10.7554/eLife.105690 (PMC12662630; doi:10.7554/eLife.105690)
Supplement: Figure 3—source data 3. [file elife-105690-fig3-data3.xlsx]

## Sheet: Sheet1
	Mean	Ratio Nestin/actin	Ratio Nestin/DAPI				Ratio Nestin/actin	Ratio Nestin/DAPI
1	21.61	2.96841	0.915678					3.58621
	7.28						6.65778	3.38644
	23.6						6.44196	3.22388
2	33.92	4.47493	3.05311				6.13831	3.15419
	7.58						5.61151	3.05311
	11.11						5.13398	3.00701
3	29.67	3.44599	2.02941				4.82155	2.88962
	8.61						4.49197	2.85605
	14.62						4.47493	2.27783
4	31.2	5.61151	3.58621				3.68099	2.24175
	5.56						5.61387	3.14456
	8.7						3.44599	2.06891
5	38.61	6.13831	3.00701				3.2016	2.05981
	6.29						2.96841	2.02941
	12.84						2.39383	1.88718
6	28.64	4.82155	3.15419				2.32646	1.72637
	5.94						2.22119	1.4943
	9.08						2.19253	1.43072
7	28.22	2.32646	2.06891				2.04891	1.3942
	12.13						1.44089	1.30852
	13.64						1.75182	1.26853
8	26.44	5.13398	2.88962				1.6594	1.08516
	5.15						1.58125	1.04549
	9.15						1.5555	0.947893
9	11.95	2.22119	1.04549				1.45907	0.915678
	5.38						1.41059	0.795544
	11.43					Mean	3.38897	2.08763
10	59.94		3.38644	8.73761		SD	1.77592	0.887689
	6.86
	17.7
11	27.95	3.2016	1.72637
	8.73
	16.19
12	47.47	6.65778	2.27783
	7.13
	20.84
13	20.92	1.58125	0.947893
	13.23
	22.07
14	44.64	2.19253	2.85605
	20.36
	15.63
15	35.76	1.6594	1.26853
	21.55
	28.19
16	33.93	2.04891	1.30852
	16.56
	25.93
17	28.27	3.68099	1.88718
	7.68
	14.98
18	56.48	1.41059	2.05981
	40.04
	27.42
19	31.39	1.5555	1.43072
	20.18
	21.94
20	28.16	1.45907	1.08516
	19.3
	25.95
21	27.17	2.39383	2.24175
	11.35
	12.12
22	43.2	1.75182	3.22388
	24.66
	13.4
23	30.77	4.49197	1.3942
	6.85
	22.07
24	43.29	6.44196	1.4943
	6.72
	28.97
	Mean	3.37694	2.09743
	SD	1.7444	0.857471

## Sheet: Sheet2
Mean	Ratio Nestin/actin	Ratio Nestin/DAPI				Ratio Nestin/actin		Ratio Nestin/DAPI
35.25	3.29439	2.44114				4.09044		5.40273
10.7						3.90639		2.44114
14.44						3.51017		1.72313
19.34	2.52151	1.13232				3.29439		1.46326
7.67						3.00334		1.35837
17.08						2.8858		1.27677
31.66			4.09044	5.40273		2.52151		1.24982
7.74						2.19656		1.13232
5.86						3.44842		2.27757
18.38	0.669581	0.672029				1.30304		1.58811
27.45						0.56281		1.00337
27.35						1.22123		0.910731
19.69	0.549693	0.910731				1.14615		0.897421
35.82						0.940083		0.886128
21.62						0.901838		0.826241
27.96	0.727557	0.826241				0.793051		0.809037
38.43						0.759124		0.672029
33.84						0.757491		0.656965
20.86	1.14615	1.00337				0.731832		0.59353
18.2						0.727557		0.491762
20.79						0.669581		0.351623
18.99	3.51017	1.35837				0.635294		0.225376
5.41						0.549693		0.212173
13.98						0.320197		0.0946832
17.11		1.24982	3.90639
4.38
13.69
2.7	0.635294	0.225376
4.25
11.98
4.55	0.940083	0.351623
4.84
12.94
1.3			0.320197	0.0946832
4.06
13.73
6.24	0.759124	0.212173
8.22
29.41
18.96	0.757491	0.656965
25.03
28.86
15.52	0.793051	0.491762
19.57
31.56
25.68	0.731832	0.886128
35.09
28.98
26.11	1.22123	1.27677
21.38
20.45
30.62	2.19656	0.897421
13.94
34.12
26.97	3.00334	0.59353
8.98
45.44
30.07	2.8858	1.46326
10.42
20.55
24.53	0.901838	0.809037
27.2
30.32
32.55	1.30304	1.72313
24.98
18.89
Mean	1.50251	0.959059
SD	1.02767	0.535765
