# Supplementary material for: Human RAP2A homolog of the Drosophila asymmetric cell division regulator Rap2l targets the stemness of glioblastoma stem cells
Source: eLife. 2025 Nov 28;14:RP105690. doi: 10.7554/eLife.105690 (PMC12662630; doi:10.7554/eLife.105690)
Supplement: Figure 5—source data 1. [file elife-105690-fig5-data1.xlsx]

## Sheet: Sheet1
		Dapi Total	Ki67+ total	% Ki67+	Ki67+ BIG	% Ki67+BIG/T Ki67+	BIG Stem/total	Ki67- BIG	Area esfera	Morfologia
GB5GFP 8 z3	Area1	42	8	19.0476	2	25	4.75		6856.9	Flat
	Area5	37	8	21.6216	2	25	6.75	1	7392.5	Flat
	Area2	22	14	63.6364	1	7.14286	4.48		3868.5	Flat
	Area4	20	1	5	1	100	5	1	4752	Flat
	Area6	19	8	42.1053	2	25	10.5		5386.8	Flat
	Area4	19	3	15.7895	1	33.3333	5.22		7646.2	Flat
	Area5	16	8	50	5	62.5	31		3969.6	Flat
	Area6	14	7	50	7	100	50		7557.9	Flat
	Area5	11	8	72.7273	8	100	73		3012.9	Flat
	Area4	11	6	54.5455	0	0	0	1	2983.9	Flat
Average				39.4473		47.7976	19.07
STDEV				22.8261		39.5773	24.5041
	Area4	132	26	19.697	6	23.0769	4.54545		21411.9	Sphere
	Area2	115	26	22.6087	5	19.2308	4.34783		16039.2	Sphere
GB5GFP 6 z5	Area1	107	17	15.8879	2	11.7647	1.86916	2	20017.2	Sphere
GB5GFP 5 z9	Area1	94	20	21.2766	8	40	8.51064		14125.5	Sphere
	Area3	92	21	22.8261	8	38.0952	8.69565	2	16121.3	Sphere
GB5GFP 4 Z9	Area1	67	13	19.403	5	38.4615	7.46269		10786	Sphere
	Area3	66	2	3.0303	1	50	1.51515		9136.3	Sphere
	Area3	62	15	24.1935	4	26.6667	6.45161		9198.3	Sphere
	Area2	54	10	18.5185	3	30	5.55556		9689.8	Sphere
	Area2	50	9	18	2	22.2222	4		8360.4	Sphere
	Area2	45	13	28.8889	6	46.1538	13.3333		8439.9	Sphere
	Area3	43	7	16.2791	6	85.7143	13.9535		12070.9	Sphere
GB5GFP 7	Area1	38	12	31.5789	5	41.6667	13.1579	2	10150.4	Sphere
	Area3	18	5	27.7778	3	60	16.6667		2538.7	Sphere
Average				20.7119		38.0752	7.86179
STDEV				6.93852		19.0008	4.76893
	esferas	celulas totales
n		1054	228		85

## Sheet: Sheet2
		Dapi Total	Ki67+ total	Ki67+ (%)	Ki67+ BIG	BIG Ki67+/Total Ki67+ (%)	BIG KI67+/TOTAL(%)	Ki67- BIG	Area esfera	Morfologia
	Area8	63	18	28.5714	3	16.6667	4.7619		10322.9	Flat
	Area5	34	5	14.7059	3	60	8.82353		9911.2	Flat
	Area4	31	8	25.8065	0	0	0		6339.9	Flat
	Area3	27	7	25.9259	4	57.1429	14.8148		6915.2	Flat
	Area4	24	1	4.16667	1	100	4.16667		2459.7	Flat
GB5Rap2A 4 z7	Area1	19	6	31.5789	4	66.6667	21.0526		2862.6	Flat
	Area5	19	3	15.7895	1	33.3333	5.26316		5091.4	Flat
	Area4	17	1	5.88235	1	100	5.88235		3430.6	Flat
	Area2	17	4	23.5294	0	0	0		3066.4	Flat
	Area4	17	3	17.6471	1	33.3333	5.88235	1	3444.3	Flat
	Area3	15	0	0	0	0	0	2	4045.6	Flat
GB5Rap2A 8	Area1	12	3	25	3	100	25		5790.3	Flat
Average				18.217		47.2619	7.97062
STDEV				10.344		39.3186	8.20266
GB5Rap2A 7 z	Area1	144	42	29.1667	4	9.52381	2.77778	2	24595.4	Sphere
	Area2	120	22	18.3333	6	27.2727	5		15798.4	Sphere
	Area4	62	16	25.8065	1	6.25	1.6129	1	11490.1	Sphere
	Area3	62	10	16.129	3	30	4.83871	1	8823.1	Sphere
	Area2	60	11	18.3333	1	9.09091	1.66667	3	13204.8	Sphere
GB5Rap2A 5 z3	Area1	59	11	18.6441	4	36.3636	6.77966		8514.1	Sphere
	Area3	59	12	20.339	2	16.6667	3.38983		11203.1	Sphere
	Area2	56	16	28.5714	1	6.25	1.78571		7858.4	Sphere
	Area6	37	6	16.2162	2	33.3333	5.40541		5889.3	Sphere
	Area2	36	6	16.6667	1	16.6667	2.77778	1	5623.7	Sphere
	Area5	36	7	19.4444	1	14.2857	2.77778	1	4758.8	Sphere
GB5Rap2A 6 z	Area1	36	12	33.3333	1	8.33333	2.77778	4	6598.3	Sphere
	Area3	32	6	18.75	2	33.3333	6.25	2	6255.5	Sphere
	Area7	26	12	46.1538	2	16.6667	7.69231	3	4341.4	Sphere
Average				23.2777		18.8598	3.96659
STDEV				8.55929		10.979	2.00918
