# Supplementary material for: Human RAP2A homolog of the Drosophila asymmetric cell division regulator Rap2l targets the stemness of glioblastoma stem cells
Source: eLife. 2025 Nov 28;14:RP105690. doi: 10.7554/eLife.105690 (PMC12662630; doi:10.7554/eLife.105690)
Supplement: Figure 5—source data 2. [file elife-105690-fig5-data2.xlsx]

## Sheet: Sheet1
	GB5GFP	GB5Rap2A
	0.014	0.018
	0.017	0.019
	0.023	0.021
	0.026	0.022
	0.026	0.022
	0.03	0.023
	0.031	0.023
	0.031	0.027
	0.033	0.027
	0.035	0.028
	0.035	0.028
	0.043	0.029
	0.043	0.03
	0.044	0.031
	0.044	0.031
	0.044	0.031
	0.046	0.033
	0.046	0.034
	0.047	0.034
	0.047	0.035
	0.049	0.035
	0.05	0.036
	0.051	0.036
	0.052	0.037
	0.053	0.039
	0.053	0.039
	0.054	0.039
	0.054	0.04
	0.055	0.04
	0.056	0.041
	0.056	0.041
	0.057	0.042
	0.057	0.043
	0.062	0.043
	0.064	0.043
	0.064	0.043
	0.067	0.045
	0.073	0.045
	0.077	0.046
	0.078	0.047
	0.078	0.047
	0.078	0.051
	0.083	0.051
	0.084	0.051
	0.088	0.052
	0.09	0.054
	0.092	0.055
	0.093	0.056
	0.095	0.057
	0.098	0.057
	0.098	0.059
	0.099	0.059
	0.1	0.06
	0.111	0.062
	0.113	0.062
	0.115	0.062
	0.115	0.063
	0.118	0.065
	0.121	0.067
	0.122	0.069
	0.127	0.076
	0.131	0.081
	0.131	0.082
	0.131	0.087
	0.133	0.087
	0.134	0.09
	0.144	0.09
	0.148	0.091
	0.161	0.092
	0.162	0.094
	0.163	0.098
	0.169	0.1
	0.172	0.1
	0.182	0.1
	0.184	0.101
	0.196	0.107
	0.203	0.111
	0.207	0.113
	0.212	0.122
	0.215	0.123
	0.219	0.126
	0.219	0.13
	0.226	0.132
	0.244	0.152
	0.249	0.197
	0.253	0.447
	0.254
	0.267
	0.288
	0.318
	0.383
Average	0.111022	0.0657442
Relative	1	0.592173
Disminucion		0.407827
SD	0.0775417	0.054194
