# Supplementary material for: Human RAP2A homolog of the Drosophila asymmetric cell division regulator Rap2l targets the stemness of glioblastoma stem cells
Source: eLife. 2025 Nov 28;14:RP105690. doi: 10.7554/eLife.105690 (PMC12662630; doi:10.7554/eLife.105690)
Supplement: Figure 6—source data 1. [file elife-105690-fig6-data1.xlsx]

## Sheet: Sheet1
N	Number of cell in each cluster
	1	2	3	4	5	6	7	8	Totales
GB5 GFP			26	33	7	17	0	0	83
GB5 Rap2A			44	22	12	3	2	0	83
%	Number of cell in each cluster
	1	2	3	4	5	6	7	8	Totales
GB5 GFP			31.3253	39.759	8.43373	20.4819	0	0	100
GB5 Rap2A			53.012	26.506	14.4578	3.61446	2.40964	0	100
N	Cells clusters				GB5 GFP	GB5 Rap2a				%	Cells clusters
	Even	Odd	Totales								Even	Odd	Totales
GB5 GFP	50	33	83							GB5 GFP	60.241	39.759	100
Gb5 Rap2a	25	58	83							Gb5 Rap2a	30.1205	69.8795	100
The chi-square statistic is 15.2015. The p-value is .000097. Significant at p < .01.
The chi-square statistic with Yates correction is 14.0097. The p-value is .000182. Significant at p < .01.
						𝚾2 (1, N = 166) = 15,2015, p = 0,000097			***
						p < 0,001
