# Supplementary material for: Human RAP2A homolog of the Drosophila asymmetric cell division regulator Rap2l targets the stemness of glioblastoma stem cells
Source: eLife. 2025 Nov 28;14:RP105690. doi: 10.7554/eLife.105690 (PMC12662630; doi:10.7554/eLife.105690)
Supplement: Figure 6—source data 2. [file elife-105690-fig6-data2.xlsx]

## Sheet: Sheet1
Picture	# of pairs counted	Numb Assimetry	Numb in 2 cells	2 cells No Numb
GFP 1/37		5	3	5
GFP 1/40		1	5	2
GFP 1/41		5	5	2
GFP 1/42		5	7	1
GFP 1/50		4	5	1
GFP 1/51		3	1	2
GFP 1/52		3	2	1
GFP 1/53		2	6	0
GFP 1/54		2	5	0
GFP 2/00		2	2	3
GFP 2/07		2	1	3
GFP 2/10		3	6	0
Total		37	48	20	105

## Sheet: Sheet2
Picture	# of pairs counted	Numb Assimetry	Numb in 2 cells	2 cells No Numb
Rap2A 1/18		6	6	0
Rap2A 1/19		5	3	1
Rap2A 1/20		1	4	0
Rap2A 1/23		8	4	0
Rap2A 1/24		9	5	2
Rap2A 2/21		6	4	1
Rap2A 2/34		4	4	0
Rap2A 2/35		4	2	2
Rap2A 2/36		2	2	0
Rap2A 2/39		7	2	0
Rap2A 2/40		6	2	1
Rap2A 2/41		9	9	1
Total		67	47	8	122
